# Supplementary material
Source: PubMed Central journal article supplement (PMC3659995)
Supplement: supp_2012.069583_2012_069583-Contributions.pdf [file supp_2012.069583_2012_069583-Contributions.pdf]

**Manuscript no. HAEMATOL/2012/069583 entitled “Myeloablative chemotherapy for chemo-sensitive recurrent follicular lymphoma: potential benefit in second relapse“**

**Authors: Silvia Montoto, Janet Matthews, Paul Greaves, Debra Lillington, Deborah Anderson, John G Gribben and T Andrew Lister**

**Information about the contributions of each person named as having participated in the study**

**1) Guarantor(s), i.e., person(s) who is (are) responsible for the integrity of the work as a whole:**

- Silvia Montoto, Centre for Haemato-Oncology Barts Cancer Institute, Queen Mary University of London, United Kingdom, E-mail: [s.montoto@qmul.ac.uk](mailto:s.montoto@qmul.ac.uk)

According to the International Committee of Medical Journal Editors (ICMJE) ([http://www.icmje.org/ethical\\_1author.html](http://www.icmje.org/ethical_1author.html)): “Authorship credit should be based on: 1) substantial contributions to conception and design, acquisition of data, or analysis and interpretation of data; 2) drafting the article or revising it critically for important intellectual content; and 3) final approval of the version to be published. Authors should meet conditions 1, 2, and 3 ..... Acquisition of funding, collection of data, or general supervision of the research group alone does not constitute authorship”.

**The guarantors of this manuscript confirm that all persons designated as authors qualify for authorship, and that each author has participated sufficiently in the work to take public responsibility for appropriate portions of the content.**

**2) Authors who participated in the conception of the study:** Silvia Montoto, John G Gribben and T Andrew Lister

**3) Design & Methods. The following authors were responsible for specific investigations:**

- Debra Lillington performed the cytogenetic analysis
- Janet Matthews performed the statistical analysis

**4) Results. The following authors were responsible for specific portions of the results, including figures and tables:**

- Janet Matthews, Paul Greaves and Deborah Anderson collected and analyzed the data
- Silvia Montoto is responsible for all tables and figures

**5) Writing the manuscript. The following authors were responsible for writing the manuscript:**

- Silvia Montoto, John G Gribben and T Andrew Lister wrote the paper
- All authors approved the final version

**6) Contributors Listed in Acknowledgments:** Silvia Montoto is kindly supported by grants from The Olivia Walduck Family and from The Mark Ridgwell Family Trust
